# Supplementary material
Source: PubMed Central journal article supplement (PMC5724560)
Supplement: NIHMS924278-supplement-Appendix_A.pdf [file NIHMS924278-supplement-Appendix_A.pdf]

APPENDIX A: Complete Search Strategy.

| Database Searched        | Number of Articles Yielded |
|--------------------------|----------------------------|
| Search date: Feb 6, 2017 |                            |
| <b>TOTAL</b>             | <b>2473</b>                |
| Medline                  | 787                        |
| CENTRAL                  | 31                         |
| EMBASE                   | 1406                       |
| CINAHL                   | 172                        |
| Pubmed (Supp)            | 31                         |
| SpeechBite               | 46                         |

-----  
 Database: Ovid MEDLINE(R) Epub Ahead of Print, In-Process & Other Non-Indexed Citations, Ovid MEDLINE(R) Daily and Ovid MEDLINE(R) <1946 to Present>  
 -----

- 1 Amyotrophic Lateral Sclerosis/ (15258)
- 2 (Amyotrophic\* adj2 Lateral\* adj2 Sclerosis\*).tw,kw. (17824)
- 3 ALS.tw,kw. (20304)
- 4 (guam adj2 disease\*).tw,kw. (47)
- 5 (charcot adj2 disease\*).tw,kw. (150)
- 6 (Lougehrig\* or Gehrig\* or Gerhig\* or Gherig\*).tw,kw. (144)
- 7 exp Motor Neuron Disease/ (22913)
- 8 motor neuron\* disease\*.tw,kw. (5345)
- 9 MND.tw,kw. (1604)
- 10 (bulbar adj2 (pals\* or paralys\*)).tw,kw. (566)
- 11 (fazio\* adj2 londe\*).tw,kw. (33)
- 12 (spinal adj2 amyotroph\*).tw,kw. (146)
- 13 (spinal adj2 muscular adj2 atroph\*).tw,kw. (4039)
- 14 (progressive adj2 muscular adj2 atroph\*).tw,kw. (516)
- 15 (myelopathic adj2 muscular adj2 atroph\*).tw,kw. (8)
- 16 (hereditary adj2 motor adj2 neuronopath\*).tw,kw. (25)
- 17 (bulbospinal adj2 neuronopath\*).tw,kw. (43)
- 18 (bulbo-spinal adj2 neuronopath\*).tw,kw. (5)
- 19 (bulbo-spinal adj2 atroph\*).tw,kw. (13)
- 20 (bulbospinal adj2 atroph\*).tw,kw. (56)
- 21 (kennedy\* adj2 (disease\* or syndrom\*)).tw,kw. (448)
- 22 (bulbar adj2 spinal adj2 atroph\*).tw,kw. (531)
- 23 ((juvenile or infantile) adj2 muscular adj2 atroph\*).tw,kw. (278)
- 24 (kugelberg-welander adj2 (disease\* or syndrom\*)).tw,kw. (137)
- 25 (kugelbergwelander adj2 (disease\* or syndrom\*)).tw,kw. (1)
- 26 (werdnig adj2 hoffmann adj2 (disease\* or syndrom\*)).tw,kw. (226)

- 27 (hereditary adj2 motor adj2 neuropath\*).tw,kw. (331)
- 28 (motor adj2 neuron\* adj2 disease\*).tw,kw. (5298)
- 29 (motor adj2 system\* adj2 diseas\*).tw,kw. (63)
- 30 (lateral adj2 scleros\*).tw,kw. (18143)
- 31 "anterior horn cell disease\*".tw,kw. (81)
- 32 or/1-31 (40835)
- 33 SOD1.af. (5938)
- 34 Superoxide dismutase.af. (68696)
- 35 c9orf72.mp. (867)
- 36 c9orf72.mp. (6)
- 37 chromosome 9 open reading frame 72.af. (101)
- 38 TARDBP.af. (320)
- 39 TAR DNA-binding protein 43.af. (438)
- 40 TDP-43.af. (1870)
- 41 TDP43.af. (124)
- 42 FUS.af. (2341)
- 43 Fused in Sarcoma.af. (344)
- 44 or/33-43 (73888)
- 45 32 or 44 (108808)
- 46 exp Deglutition Disorders/ (46267)
- 47 dysphagi\*.tw,kw. (22464)
- 48 deglut\*.tw,kw. (3838)
- 49 swallow\*.tw,kw. (24187)
- 50 Deglutition/ (8415)
- 51 or/46-50 (76809)
- 52 45 and 51 (787)**

-----  
 Database: EBM Reviews - Cochrane Central Register of Controlled Trials <November 2016>

Search Strategy:

- 
- 1 Amyotrophic Lateral Sclerosis/ (272)
  - 2 (Amyotrophic\* adj2 Lateral\* adj2 Sclerosis\*).tw,kw. (491)
  - 3 ALS.tw,kw. (702)
  - 4 (guam adj2 disease\*).tw,kw. (0)
  - 5 (charcot adj2 disease\*).tw,kw. (2)
  - 6 (Lougehrig\* or Gehrigh\* or Gerhig\* or Gherig\*).tw,kw. (1)
  - 7 exp Motor Neuron Disease/ (353)
  - 8 motor neuron\* disease\*.tw,kw. (75)
  - 9 MND.tw,kw. (45)
  - 10 (bulbar adj2 (pals\* or paralys\*)).tw,kw. (24)
  - 11 (fazio\* adj2 londe\*).tw,kw. (0)
  - 12 (spinal adj2 amyotroph\*).tw,kw. (1)
  - 13 (spinal adj2 muscular adj2 atroph\*).tw,kw. (64)

- 14 (progressive adj2 muscular adj2 atroph\*).tw,kw. (2)
- 15 (myelopathic adj2 muscular adj2 atroph\*).tw,kw. (0)
- 16 (hereditary adj2 motor adj2 neuronopath\*).tw,kw. (0)
- 17 (bulbospinal adj2 neuronopath\*).tw,kw. (0)
- 18 (bulbo-spinal adj2 neuronopath\*).tw,kw. (0)
- 19 (bulbo-spinal adj2 atroph\*).tw,kw. (0)
- 20 (bulbospinal adj2 atroph\*).tw,kw. (0)
- 21 (kennedy\* adj2 (disease\* or syndrom\*)).tw,kw. (4)
- 22 (bulbar adj2 spinal adj2 atroph\*).tw,kw. (10)
- 23 ((juvenile or infantile) adj2 muscular adj2 atroph\*).tw,kw. (3)
- 24 (kugelberg-welander adj2 (disease\* or syndrom\*)).tw,kw. (0)
- 25 (kugelbergwelander adj2 (disease\* or syndrom\*)).tw,kw. (0)
- 26 (werdnig adj2 hoffmann adj2 (disease\* or syndrom\*)).tw,kw. (1)
- 27 (hereditary adj2 motor adj2 neuropath\*).tw,kw. (29)
- 28 (motor adj2 neuron\* adj2 disease\*).tw,kw. (83)
- 29 (motor adj2 system\* adj2 diseas\*).tw,kw. (3)
- 30 (lateral adj2 scleros\*).tw,kw. (495)
- 31 "anterior horn cell disease\*".tw,kw. (0)
- 32 or/1-31 (1086)
- 33 SOD1.af. (29)
- 34 Superoxide dismutase.af. (1389)
- 35 c9orf72.mp. (5)
- 36 c9orf72.mp. (0)
- 37 chromosome 9 open reading frame 72.af. (1)
- 38 TARDBP.af. (4)
- 39 TAR DNA-binding protein 43.af. (4)
- 40 TDP-43.af. (7)
- 41 TDP43.af. (0)
- 42 FUS.af. (37)
- 43 Fused in Sarcoma.af. (1)
- 44 or/33-43 (1443)
- 45 32 or 44 (2505)
- 46 exp Deglutition Disorders/ (1949)
- 47 dysphagi\*.tw,kw. (1733)
- 48 deglut\*.tw,kw. (112)
- 49 swallow\*.tw,kw. (1968)
- 50 Deglutition/ (289)
- 51 or/46-50 (4656)
- 52 45 and 51 (31)**

---

Database: Embase <1974 to 2017 February 03>

Search Strategy:

---

- 1 amyotrophic lateral sclerosis/ (31062)

2 (Amyotrophic\* adj2 Lateral\* adj2 Sclerosis\*).tw,kw. (24771)  
3 ALS.tw,kw. (29173)  
4 (guam adj2 disease\*).tw,kw. (52)  
5 (charcot adj2 disease\*).tw,kw. (187)  
6 (Lougehrig\* or Gehrig\* or Gerhig\* or Gherig\*).tw,kw. (244)  
7 exp Motor Neuron Disease/ (37888)  
8 motor neuron\* disease\*.tw,kw. (7957)  
9 MND.tw,kw. (2821)  
10 (bulbar adj2 (pals\* or paralys\*)).tw,kw. (819)  
11 (fazio\* adj2 londe\*).tw,kw. (49)  
12 (spinal adj2 amyotroph\*).tw,kw. (160)  
13 exp spinal muscular atrophy/ (43959)  
14 (spinal adj2 muscular adj2 atroph\*).tw,kw. (5267)  
15 exp hereditary spinal muscular atrophy/ (2373)  
16 (progressive adj2 muscular adj2 atroph\*).tw,kw. (614)  
17 (myelopathic adj2 muscular adj2 atroph\*).tw,kw. (5)  
18 (hereditary adj2 motor adj2 neuronopath\*).tw,kw. (37)  
19 hereditary motor sensory neuropathy/ (8742)  
20 (bulbospinal adj2 neuronopath\*).tw,kw. (50)  
21 (bulbo-spinal adj2 neuronopath\*).tw,kw. (5)  
22 (bulbo-spinal adj2 atroph\*).tw,kw. (15)  
23 (bulbospinal adj2 atroph\*).tw,kw. (67)  
24 Kennedy disease/ (1056)  
25 (kennedy\* adj2 (disease\* or syndrom\*)).tw,kw. (594)  
26 (bulbar adj2 spinal adj2 atroph\*).tw,kw. (703)  
27 ((juvenile or infantile) adj2 muscular adj2 atroph\*).tw,kw. (322)  
28 Kugelberg Welander disease/ (247)  
29 (kugelberg-welander adj2 (disease\* or syndrom\*)).tw,kw. (178)  
30 (kugelbergwelander adj2 (disease\* or syndrom\*)).tw,kw. (0)  
31 Werdnig Hoffmann disease/ (480)  
32 (werdnig adj2 hoffmann adj2 (disease\* or syndrom\*)).tw,kw. (282)  
33 (hereditary adj2 motor adj2 neuropath\*).tw,kw. (526)  
34 (motor adj2 neuron\* adj2 disease\*).tw,kw. (8227)  
35 (motor adj2 system\* adj2 diseas\*).tw,kw. (84)  
36 (lateral adj2 scleros\*).tw,kw. (25279)  
37 "anterior horn cell disease\*".tw,kw. (119)  
38 or/1-37 (67374)  
39 SOD1.af. (6990)  
40 superoxide dismutase/ (72990)  
41 Superoxide dismutase.af. (96265)  
42 c9orf72.mp. (1908)  
43 c9orf72.mp. (18)  
44 chromosome 9 open reading frame 72.af. (245)  
45 TARDBP.af. (692)

- 46 TAR DNA binding protein/ (2774)
- 47 TAR DNA-binding protein 43.af. (635)
- 48 TDP-43.af. (3516)
- 49 TDP43.af. (409)
- 50 FUS.af. (3996)
- 51 fused in sarcoma protein/ (667)
- 52 Fused in Sarcoma.af. (953)
- 53 or/39-52 (106333)
- 54 38 or 53 (163651)
- 55 exp dysphagia/ (57612)
- 56 dysphagi\*.tw,kw. (36231)
- 57 deglut\*.tw,kw. (5185)
- 58 swallow\*.tw,kw. (35772)
- 59 swallowing/ (22273)
- 60 or/55-59 (89883)
- 61 54 and 60 (1988)
- 62 limit 61 to (conference abstract or conference paper or conference proceeding or "conference review") (582)
- 63 61 not 62 (1406)**

-----  
 Database: CINAHL  
 -----

| #          | Query                           | Limiters/Expanders                   | Last Run Via                                                                                                                 | Results    |
|------------|---------------------------------|--------------------------------------|------------------------------------------------------------------------------------------------------------------------------|------------|
| <b>S57</b> | <b>S50 AND S56</b>              | <b>Search modes - Boolean/Phrase</b> | <b>Interface - EBSCOhost<br/>Research Databases<br/>Search Screen - Advanced Search<br/>Database - CINAHL with Full Text</b> | <b>172</b> |
| S56        | S51 OR S52 OR S53 OR S54 OR S55 | Search modes - Boolean/Phrase        | Interface - EBSCOhost<br>Research Databases<br>Search Screen - Advanced Search<br>Database - CINAHL with Full Text           | 8,287      |
| S55        | swallow*                        | Search modes - Boolean/Phrase        | Interface - EBSCOhost<br>Research Databases<br>Search Screen - Advanced Search<br>Database - CINAHL with                     | 4,723      |

|     |                                                                                         |                               | Full Text                                                                                                          |        |
|-----|-----------------------------------------------------------------------------------------|-------------------------------|--------------------------------------------------------------------------------------------------------------------|--------|
| S54 | (MH "Deglutition")                                                                      | Search modes - Boolean/Phrase | Interface - EBSCOhost<br>Research Databases<br>Search Screen - Advanced Search<br>Database - CINAHL with Full Text | 1,930  |
| S53 | deglut*                                                                                 | Search modes - Boolean/Phrase | Interface - EBSCOhost<br>Research Databases<br>Search Screen - Advanced Search<br>Database - CINAHL with Full Text | 5,171  |
| S52 | dysphagi*                                                                               | Search modes - Boolean/Phrase | Interface - EBSCOhost<br>Research Databases<br>Search Screen - Advanced Search<br>Database - CINAHL with Full Text | 3,668  |
| S51 | (MH "Deglutition Disorders")                                                            | Search modes - Boolean/Phrase | Interface - EBSCOhost<br>Research Databases<br>Search Screen - Advanced Search<br>Database - CINAHL with Full Text | 4,028  |
| S50 | S35 OR S49                                                                              | Search modes - Boolean/Phrase | Interface - EBSCOhost<br>Research Databases<br>Search Screen - Advanced Search<br>Database - CINAHL with Full Text | 10,484 |
| S49 | S36 OR S37 OR S38 OR S39 OR S40 OR S41 OR S42 OR S43 OR S44 OR S45 OR S46 OR S47 OR S48 | Search modes - Boolean/Phrase | Interface - EBSCOhost<br>Research Databases<br>Search Screen - Advanced Search<br>Database - CINAHL with Full Text | 3,888  |
| S48 | TX Fused in Sarcoma                                                                     | Search modes - Boolean/Phrase | Interface - EBSCOhost<br>Research Databases                                                                        | 27     |

|     |                               |                               |                                                                                                                    |     |
|-----|-------------------------------|-------------------------------|--------------------------------------------------------------------------------------------------------------------|-----|
|     |                               |                               | Search Screen - Advanced Search<br>Database - CINAHL with Full Text                                                |     |
| S47 | TX FUS                        | Search modes - Boolean/Phrase | Interface - EBSCOhost<br>Research Databases<br>Search Screen - Advanced Search<br>Database - CINAHL with Full Text | 723 |
| S46 | TX TDP43                      | Search modes - Boolean/Phrase | Interface - EBSCOhost<br>Research Databases<br>Search Screen - Advanced Search<br>Database - CINAHL with Full Text | 176 |
| S45 | TX TDP-43                     | Search modes - Boolean/Phrase | Interface - EBSCOhost<br>Research Databases<br>Search Screen - Advanced Search<br>Database - CINAHL with Full Text | 176 |
| S44 | (MH "TDP-43 Proteinopathies") | Search modes - Boolean/Phrase | Interface - EBSCOhost<br>Research Databases<br>Search Screen - Advanced Search<br>Database - CINAHL with Full Text | 9   |
| S43 | TX TAR DNA-binding protein 43 | Search modes - Boolean/Phrase | Interface - EBSCOhost<br>Research Databases<br>Search Screen - Advanced Search<br>Database - CINAHL with Full Text | 36  |
| S42 | TX TARDBP                     | Search modes - Boolean/Phrase | Interface - EBSCOhost<br>Research Databases<br>Search Screen - Advanced Search<br>Database - CINAHL with           | 36  |

|     |                                             |                                  | Full Text                                                                                                                |       |
|-----|---------------------------------------------|----------------------------------|--------------------------------------------------------------------------------------------------------------------------|-------|
| S41 | TX chromosome 9<br>open reading frame<br>72 | Search modes -<br>Boolean/Phrase | Interface - EBSCOhost<br>Research Databases<br>Search Screen - Advanced<br>Search<br>Database - CINAHL with<br>Full Text | 16    |
| S40 | TX c9orf72                                  | Search modes -<br>Boolean/Phrase | Interface - EBSCOhost<br>Research Databases<br>Search Screen - Advanced<br>Search<br>Database - CINAHL with<br>Full Text | 0     |
| S39 | TX c9orf72                                  | Search modes -<br>Boolean/Phrase | Interface - EBSCOhost<br>Research Databases<br>Search Screen - Advanced<br>Search<br>Database - CINAHL with<br>Full Text | 109   |
| S38 | TX Superoxide<br>dismutase                  | Search modes -<br>Boolean/Phrase | Interface - EBSCOhost<br>Research Databases<br>Search Screen - Advanced<br>Search<br>Database - CINAHL with<br>Full Text | 2,786 |
| S37 | (MH "Superoxide<br>Dismutase")              | Search modes -<br>Boolean/Phrase | Interface - EBSCOhost<br>Research Databases<br>Search Screen - Advanced<br>Search<br>Database - CINAHL with<br>Full Text | 1,091 |
| S36 | TX SOD1                                     | Search modes -<br>Boolean/Phrase | Interface - EBSCOhost<br>Research Databases<br>Search Screen - Advanced<br>Search<br>Database - CINAHL with<br>Full Text | 365   |
| S35 | S1 OR S2 OR S3 OR<br>S4 OR S5 OR S6 OR      | Search modes -<br>Boolean/Phrase | Interface - EBSCOhost<br>Research Databases                                                                              | 6,915 |

|     |                                                                                                                                                                                               |                               |                                                                                                                 |       |
|-----|-----------------------------------------------------------------------------------------------------------------------------------------------------------------------------------------------|-------------------------------|-----------------------------------------------------------------------------------------------------------------|-------|
|     | S7 OR S8 OR S9 OR S10 OR S11 OR S12 OR S13 OR S14 OR S15 OR S16 OR S17 OR S18 OR S19 OR S20 OR S21 OR S22 OR S23 OR S24 OR S25 OR S26 OR S27 OR S28 OR S29 OR S30 OR S31 OR S32 OR S33 OR S34 |                               | Search Screen - Advanced Search<br>Database - CINAHL with Full Text                                             |       |
| S34 | "anterior horn cell disease*"                                                                                                                                                                 | Search modes - Boolean/Phrase | Interface - EBSCOhost Research Databases<br>Search Screen - Advanced Search<br>Database - CINAHL with Full Text | 8     |
| S33 | (lateral n2 scleros*)                                                                                                                                                                         | Search modes - Boolean/Phrase | Interface - EBSCOhost Research Databases<br>Search Screen - Advanced Search<br>Database - CINAHL with Full Text | 2,273 |
| S32 | (motor n2 system* n2 diseas*)                                                                                                                                                                 | Search modes - Boolean/Phrase | Interface - EBSCOhost Research Databases<br>Search Screen - Advanced Search<br>Database - CINAHL with Full Text | 6     |
| S31 | (motor n2 neuron* n2 disease*)                                                                                                                                                                | Search modes - Boolean/Phrase | Interface - EBSCOhost Research Databases<br>Search Screen - Advanced Search<br>Database - CINAHL with Full Text | 981   |
| S30 | (hereditary n2 motor n2 neuropath*)                                                                                                                                                           | Search modes - Boolean/Phrase | Interface - EBSCOhost Research Databases<br>Search Screen - Advanced Search<br>Database - CINAHL with           | 311   |

|     |                                                           |                                  | Full Text                                                                                                                |    |
|-----|-----------------------------------------------------------|----------------------------------|--------------------------------------------------------------------------------------------------------------------------|----|
| S29 | (werdnig n2<br>hoffmann n2<br>(disease* or<br>syndrom*))  | Search modes -<br>Boolean/Phrase | Interface - EBSCOhost<br>Research Databases<br>Search Screen - Advanced<br>Search<br>Database - CINAHL with<br>Full Text | 2  |
| S28 | (kugelbergwelder<br>n2 (disease* or<br>syndrom*))         | Search modes -<br>Boolean/Phrase | Interface - EBSCOhost<br>Research Databases<br>Search Screen - Advanced<br>Search<br>Database - CINAHL with<br>Full Text | 0  |
| S27 | (kugelberg-<br>welder n2<br>(disease* or<br>syndrom*))    | Search modes -<br>Boolean/Phrase | Interface - EBSCOhost<br>Research Databases<br>Search Screen - Advanced<br>Search<br>Database - CINAHL with<br>Full Text | 3  |
| S26 | ((juvenile or<br>infantile) n2<br>muscular n2<br>atroph*) | Search modes -<br>Boolean/Phrase | Interface - EBSCOhost<br>Research Databases<br>Search Screen - Advanced<br>Search<br>Database - CINAHL with<br>Full Text | 11 |
| S25 | (bulbar n2 spinal n2<br>atroph*)                          | Search modes -<br>Boolean/Phrase | Interface - EBSCOhost<br>Research Databases<br>Search Screen - Advanced<br>Search<br>Database - CINAHL with<br>Full Text | 24 |
| S24 | (kennedy* n2<br>(disease* or<br>syndrom*))                | Search modes -<br>Boolean/Phrase | Interface - EBSCOhost<br>Research Databases<br>Search Screen - Advanced<br>Search<br>Database - CINAHL with<br>Full Text | 20 |
| S23 | (bulbospinal n2<br>atroph*)                               | Search modes -<br>Boolean/Phrase | Interface - EBSCOhost<br>Research Databases                                                                              | 0  |

|     |                                       |                               |                                                                                                                 |    |
|-----|---------------------------------------|-------------------------------|-----------------------------------------------------------------------------------------------------------------|----|
|     |                                       |                               | Search Screen - Advanced Search<br>Database - CINAHL with Full Text                                             |    |
| S22 | (bulbo-spinal n2 atroph*)             | Search modes - Boolean/Phrase | Interface - EBSCOhost Research Databases<br>Search Screen - Advanced Search<br>Database - CINAHL with Full Text | 10 |
| S21 | (MH "Bulbo-Spinal Atrophy, X-Linked") | Search modes - Boolean/Phrase | Interface - EBSCOhost Research Databases<br>Search Screen - Advanced Search<br>Database - CINAHL with Full Text | 10 |
| S20 | (bulbo-spinal n2 neuronopath*)        | Search modes - Boolean/Phrase | Interface - EBSCOhost Research Databases<br>Search Screen - Advanced Search<br>Database - CINAHL with Full Text | 0  |
| S19 | (bulbospinal n2 neuronopath*)         | Search modes - Boolean/Phrase | Interface - EBSCOhost Research Databases<br>Search Screen - Advanced Search<br>Database - CINAHL with Full Text | 0  |
| S18 | (hereditary n2 motor n2 neuronopath*) | Search modes - Boolean/Phrase | Interface - EBSCOhost Research Databases<br>Search Screen - Advanced Search<br>Database - CINAHL with Full Text | 2  |
| S17 | (myelopathic n2 muscular n2 atroph*)  | Search modes - Boolean/Phrase | Interface - EBSCOhost Research Databases<br>Search Screen - Advanced Search<br>Database - CINAHL with           | 0  |

|     |                                          |                                  | Full Text                                                                                                                |     |
|-----|------------------------------------------|----------------------------------|--------------------------------------------------------------------------------------------------------------------------|-----|
| S16 | progressive n2<br>muscular n2<br>atroph* | Search modes -<br>Boolean/Phrase | Interface - EBSCOhost<br>Research Databases<br>Search Screen - Advanced<br>Search<br>Database - CINAHL with<br>Full Text | 28  |
| S15 | spinal n2 muscular<br>n2 atroph*         | Search modes -<br>Boolean/Phrase | Interface - EBSCOhost<br>Research Databases<br>Search Screen - Advanced<br>Search<br>Database - CINAHL with<br>Full Text | 399 |
| S14 | (MH "Muscular<br>Atrophy, Spinal+")      | Search modes -<br>Boolean/Phrase | Interface - EBSCOhost<br>Research Databases<br>Search Screen - Advanced<br>Search<br>Database - CINAHL with<br>Full Text | 166 |
| S13 | (spinal n2<br>amyotroph*)                | Search modes -<br>Boolean/Phrase | Interface - EBSCOhost<br>Research Databases<br>Search Screen - Advanced<br>Search<br>Database - CINAHL with<br>Full Text | 9   |
| S12 | (fazio* n2 londe)                        | Search modes -<br>Boolean/Phrase | Interface - EBSCOhost<br>Research Databases<br>Search Screen - Advanced<br>Search<br>Database - CINAHL with<br>Full Text | 3   |
| S11 | (MH "Bulbar Palsy,<br>Progressive+")     | Search modes -<br>Boolean/Phrase | Interface - EBSCOhost<br>Research Databases<br>Search Screen - Advanced<br>Search<br>Database - CINAHL with<br>Full Text | 11  |
| S10 | (bulbar n2 (pals* or<br>paralys*))       | Search modes -<br>Boolean/Phrase | Interface - EBSCOhost<br>Research Databases                                                                              | 35  |

|    |                                               |                               |                                                                                                                 |       |
|----|-----------------------------------------------|-------------------------------|-----------------------------------------------------------------------------------------------------------------|-------|
|    |                                               |                               | Search Screen - Advanced Search<br>Database - CINAHL with Full Text                                             |       |
| S9 | MND                                           | Search modes - Boolean/Phrase | Interface - EBSCOhost Research Databases<br>Search Screen - Advanced Search<br>Database - CINAHL with Full Text | 190   |
| S8 | motor neuron* disease*                        | Search modes - Boolean/Phrase | Interface - EBSCOhost Research Databases<br>Search Screen - Advanced Search<br>Database - CINAHL with Full Text | 964   |
| S7 | (MH "Motor Neuron Diseases+")                 | Search modes - Boolean/Phrase | Interface - EBSCOhost Research Databases<br>Search Screen - Advanced Search<br>Database - CINAHL with Full Text | 4,956 |
| S6 | (Lougehrig* or Gehrig* or Gerhig* or Gherig*) | Search modes - Boolean/Phrase | Interface - EBSCOhost Research Databases<br>Search Screen - Advanced Search<br>Database - CINAHL with Full Text | 40    |
| S5 | (charcot n2 disease*)                         | Search modes - Boolean/Phrase | Interface - EBSCOhost Research Databases<br>Search Screen - Advanced Search<br>Database - CINAHL with Full Text | 464   |
| S4 | (guam n2 disease*)                            | Search modes - Boolean/Phrase | Interface - EBSCOhost Research Databases<br>Search Screen - Advanced Search<br>Database - CINAHL with           | 3     |

|    |                                                |                               | Full Text                                                                                                          |       |
|----|------------------------------------------------|-------------------------------|--------------------------------------------------------------------------------------------------------------------|-------|
| S3 | ALS                                            | Search modes - Boolean/Phrase | Interface - EBSCOhost<br>Research Databases<br>Search Screen - Advanced Search<br>Database - CINAHL with Full Text | 1,698 |
| S2 | (Amyotrophic* n2<br>Lateral* n2<br>Sclerosis*) | Search modes - Boolean/Phrase | Interface - EBSCOhost<br>Research Databases<br>Search Screen - Advanced Search<br>Database - CINAHL with Full Text | 2,255 |
| S1 | (MH "Amyotrophic Lateral Sclerosis")           | Search modes - Boolean/Phrase | Interface - EBSCOhost<br>Research Databases<br>Search Screen - Advanced Search<br>Database - CINAHL with Full Text | 1,972 |

-----  
Database: PubMed  
-----

((pubstatusaheadofprint OR publisher[sb] OR pubmednotmedline[sb]) AND  
((((((((Deglutition Disorders[MeSH Terms]) OR Deglutition[MeSH Terms]) OR  
dysphagi\*[Title/Abstract]) OR dysphagi\*[Other Term]) OR deglut\*[Title/Abstract]) OR  
deglut\*[Other Term]) OR swallow\*[Title/Abstract]) OR swallow\*[Other Term]))AND  
((((((((((((SOD1) OR Superoxide dismutase) OR c9orf72) OR c9orf72) OR chromosome 9  
open reading frame 72) OR TARDBP) OR TAR DNA-binding protein 43) OR TDP-43) OR  
TDP43) OR FUS) OR Fused in Sarcoma)) OR (((((((((((((((Amyotrophic Lateral  
Sclerosis[MeSH Terms]) OR (Amyotrophic\*[Title/Abstract] AND Lateral\* [Title/Abstract]  
AND Sclerosis\*[Title/Abstract])) OR (Amyotrophic\*[Other Term] AND Lateral\* [Other  
Term] AND Sclerosis\*[Other Term])) OR (guam[Title/Abstract] AND  
disease\*[Title/Abstract])) OR (guam[Other Term] AND disease\*[Other Term])) OR  
(charcot[Title/Abstract] AND disease\*[Title/Abstract])) OR (charcot[Other Term] AND  
disease\*[Other Term])) AND (Lougehrig\*[Title/Abstract] OR Gehrigh\*[Title/Abstract] OR  
Gerhig\*[Title/Abstract] OR Gherig\*[Title/Abstract])) OR (Lougehrig\*[Other Term] OR  
Gehrigh\*[Other Term] OR Gerhig\*[Other Term] OR Gherig\*[Other Term])) OR Motor  
Neuron Disease[MeSH Terms]) OR motor neuron\* disease\*[Title/Abstract]) OR motor  
neuron\* disease\*[Other Term]) OR MND[Title/Abstract]) OR MND[Other Term])) OR  
((((((((((((((((bulbar[Title/Abstract] AND pals\*[Title/Abstract])) OR (bulbar[Other Term]



(lateral[Title/Abstract] AND scleros\*[Title/Abstract])) OR (lateral[Other Term] AND scleros\*[Other Term])) OR anterior horn cell disease\*[Title/Abstract]) OR anterior horn cell disease\*[Other Term]))))

---

Database: SpeechBite

---

Included Terms:

- lateral scleros (29)
- motor system diseases (13)
- Gehrig (1)
- Motor Neuron Disease (5)
- bulbar palsy (1)
- bulbar paralys (2)
- spinal amyotroph (2)
- spinal muscular atroph (2)
- kennedy disease (1)
- kennedy syndrom (1)
- werdnig hoffmann (1)

TOTAL: 58 (46 unique) papers

Excluded Terms (0 results, or other rationale - defined)

- ALS (captures non-specific words, e.g., "also")
- FUS (captures non-specific words, e.g., "effusion")
- guam disease
- charcot disease
- lougehrig
- Gherig
- Gerhig
- MND
- fazio londe
- progressive muscular atroph
- myelopathic muscular atroph
- hereditary motor neuronopath
- bulbospinal neuronopath
- bulbo spinal neuronopath
- bulbospinal atroph
- bulbo spinal atroph
- bulbar spinal atroph
- juvenile muscular atroph
- infantile muscular atroph

- kugelberg-welander disease
- kugelberg-welander syndrom
- kugelbergwelander disease
- kugelbergwelander syndrom
- hereditary motor neuropath
- anterior horn cell disease
