# Supplementary material
Source: PubMed Central journal article supplement (PMC5724560)
Supplement: NIHMS924278-supplement-Appendix_B.pdf [file NIHMS924278-supplement-Appendix_B.pdf]

APPENDIX B: Articles included in review (N=157), alphabetically.

1. Achem, S.R. and K.R. Devault, *Dysphagia in aging*. Journal of Clinical Gastroenterology, 2005. **39**(5): p. 357-71.
2. Altman, K.W., et al., *Dysphagia in stroke, neurodegenerative disease, and advanced dementia*. Otolaryngologic Clinics of North America, 2013. **46**(6): p. 1137-49.
3. Amin, M.R., et al., *Sensory testing in the assessment of laryngeal sensation in patients with amyotrophic lateral sclerosis*. Annals of Otolaryngology, Rhinology & Laryngology, 2006. **115**(7): p. 528-34.
4. Appel, V., et al., *A rating scale for amyotrophic lateral sclerosis: description and preliminary experience*. Annals of Neurology, 1987. **22**(3): p. 328-33.
5. Aydogdu, I., Z. Tanriverdi, and C. Ertekin, *Dysfunction of bulbar central pattern generator in ALS patients with dysphagia during sequential deglutition*. Clinical Neurophysiology, 2011. **122**(6): p. 1219-28.
6. Baker, L., *Motor neurone disease: overview and case study -- a community nursing perspective*. Australasian Journal of Neuroscience, 1997. **10**(2): p. 6-9 4p.
7. Barber, C., *Management of bulbar symptoms in motor neurone disease: a community speech and language therapist perspective*. British Journal of Neuroscience Nursing, 2015. **11**(1): p. 41-46 6p.
8. Beal, M.F. and E.P. Richardson, Jr., *Primary lateral sclerosis: a case report*. Archives of Neurology, 1981. **38**(10): p. 630-3.
9. Benditt, J.O., *Respiratory complications of amyotrophic lateral sclerosis*. Seminars in Respiratory & Critical Care Medicine, 2002. **23**(3): p. 239-47.
10. Benstead, T.J.-T., C. Leddin, D., *Nutrition with gastrostomy feeding tubes for amyotrophic lateral sclerosis in Canada*. Canadian Journal of Neurological Sciences, 2016. **43**(6): p. 796-800.
11. Bevan, K. and M.V. Griffiths, *Chronic aspiration and laryngeal competence*. Journal of Laryngology and Otology, 1989. **103**(2): p. 196-199.
12. Borasio, G.D. and R.G. Miller, *Clinical characteristics and management of ALS*. Seminars in Neurology, 2001. **21**(2): p. 155-66.
13. Bosma, J.F. and D.R. Brodie, *Disabilities of the pharynx in amyotrophic lateral sclerosis as demonstrated by cineradiography*. Radiology, 1969. **92**(1): p. 97-103.
14. Briani, C., et al., *Radiological evidence of subclinical dysphagia in motor neuron disease*. Journal of Neurology, 1998. **245**(4): p. 211-6.

15. Buchholz, D.W., *Neurogenic dysphagia: what is the cause when the cause is not obvious?* *Dysphagia*, 1994. **9**(4): p. 245-55.
16. Buchholz, D.W., *Dysphagia associated with neurological disorders.* *Acta Oto-Rhino-Laryngologica Belgica*, 1994. **48**(2): p. 143-55.
17. Campbell, M.J. and P. Enderby, *Management of motor neurone disease.* *Journal of the Neurological Sciences*, 1984. **64**(1): p. 65-71.
18. Carpenter, R.J., 3rd, T.J. McDonald, and F.M. Howard, Jr., *The otolaryngologic presentation of amyotrophic lateral sclerosis.* *Otolaryngology*, 1978. **86**(3 Pt 1): p. ORL479-84.
19. Cerero Lapiedra, R., L.A. Moreno Lopez, and G.C. Esparza Gomez, *Progressive bulbar palsy: a case report diagnosed by lingual symptoms.* *Journal of Oral Pathology & Medicine*, 2002. **31**(5): p. 277-9.
20. Ceylan, B.G.K., P. Saygin, H. Demirel, H. F. Eroglu, F., *Cardiac arrest due to pneumoperitoneum after PEG insertion in ALS patient.* *Journal of Clinical and Analytical Medicine*, 2016. **7**(5): p. 743-745.
21. Chen, M.Y., et al., *Clinical and videofluoroscopic evaluation of swallowing in 41 patients with neurologic disease.* *Gastrointestinal Radiology*, 1992. **17**(2): p. 95-8.
22. Chio, A., et al., *Safety and factors related to survival after percutaneous endoscopic gastrostomy in ALS.* *ALS Percutaneous Endoscopic Gastrostomy Study Group.* *Neurology*, 1999. **53**(5): p. 1123-5.
23. Chio, A., et al., *Percutaneous radiological gastrostomy: a safe and effective method of nutritional tube placement in advanced ALS.* *Journal of Neurology, Neurosurgery & Psychiatry*, 2004. **75**(4): p. 645-7.
24. Cock, C.B., L. Kritas, S. Burgstad, C. M. Thompson, A. Heddle, R. Fraser, R. J. Omari, T. I., *Maximum upper esophageal sphincter (UES) admittance: a non-specific marker of UES dysfunction.* *Neurogastroenterology & Motility*, 2016. **28**(2): p. 225-33.
25. Corcia, P. and V. Meininger, *Management of amyotrophic lateral sclerosis.* *Drugs*, 2008. **68**(8): p. 1037-48.
26. da Costa Franceschini, A. and L.F. Mourao, *Dysarthria and dysphagia in Amyotrophic Lateral Sclerosis with spinal onset: a study of quality of life related to swallowing.* *Neurorehabilitation*, 2015. **36**(1): p. 127-34.
27. David, V.C., *Relief of dysphagia in motor neurone disease with cricopharyngeal myotomy.* *Annals of the Royal College of Surgeons of England*, 1985. **67**(4): p. 229-31.

28. Desport, J.C., et al., *Complications and survival following radiologically and endoscopically-guided gastrostomy in patients with amyotrophic lateral sclerosis*. *Amyotrophic Lateral Sclerosis & Other Motor Neuron Disorders*, 2005. **6**(2): p. 88-93.
29. Desport, J.C., et al., *Nutritional assessment and survival in ALS patients*. *Amyotrophic Lateral Sclerosis & Other Motor Neuron Disorders*, 2000. **1**(2): p. 91-6.
30. D'Ottaviano, F.G., et al., *Fiberoptic endoscopy evaluation of swallowing in patients with amyotrophic lateral sclerosis*. *Revista Brasileira de Otorrinolaringologia*, 2013. **79**(3): p. 349-53.
31. Dworkin, J.P. and D.E. Hartman, *Progressive speech deterioration and dysphagia in amyotrophic lateral sclerosis: case report*. *Archives of Physical Medicine & Rehabilitation*, 1979. **60**(9): p. 423-5.
32. Easterling, C., et al., *Changes in tongue pressure, pulmonary function, and salivary flow in patients with amyotrophic lateral sclerosis*. *Dysphagia*, 2013. **28**(2): p. 217-25.
33. Elman, L.B., et al., *Palliative care in amyotrophic lateral sclerosis, Parkinson's disease, and multiple sclerosis*. *Journal of Palliative Medicine*, 2007. **10**(2): p. 433-457.
34. Erdem, N.S.K., K. Unal, A. Kizilay, F. Ogus, C. Uysal, H., *The interaction between breathing and swallowing in amyotrophic lateral sclerosis*. *Acta Neurologica Belgica*, 2016. **116**(4): p. 549-556.
35. Ertekin, C., et al., *Pathophysiological mechanisms of oropharyngeal dysphagia in amyotrophic lateral sclerosis*. *Brain*, 2000. **123**(Pt 1): p. 125-40.
36. Ertekin, C., et al., *Electrodiagnostic methods for neurogenic dysphagia*. *Electroencephalography & Clinical Neurophysiology*, 1998. **109**(4): p. 331-40.
37. Escuro, A.A., *Nutrition support in amyotrophic lateral sclerosis: from diagnosis through terminal phase*. *Support Line*, 2012. **34**(2): p. 8-19 10p.
38. Fattori, B., et al., *Assessment of swallowing by oropharyngoesophageal scintigraphy in patients with amyotrophic lateral sclerosis*. *Dysphagia*, 2006. **21**(4): p. 280-6.
39. Fattori, B.S., G. Mancini, V. Bastiani, L. Bongioanni, P. Caldarazzo Ienco, E. Barillari, M. R. Romeo, S. O. Nacci, A., *Dysphagia in Amyotrophic Lateral Sclerosis: Relationships between disease progression and Fiberoptic Endoscopic Evaluation of Swallowing*. *Auris Nasus Larynx*, 2016. **17**.
40. Garfinkle, T.J. and C.P. Kimmelman, *Neurologic disorders: amyotrophic lateral sclerosis, myasthenia gravis, multiple sclerosis, and poliomyelitis*. *American Journal of Otolaryngology*, 1982. **3**(3): p. 204-12.

41. Goeleven, A., et al., *Manofluorographic evaluation of swallowing in amyotrophic lateral sclerosis and its relationship with clinical evaluation of swallowing*. *Amyotrophic Lateral Sclerosis*, 2006. **7**(4): p. 235-40.
42. Greenwood, D.I., *Nutrition management of amyotrophic lateral sclerosis*. *Nutrition in Clinical Practice*, 2013. **28**(3): p. 392-9.
43. Guilloff, R.J., et al., *Controlled acute trial of a thyrotrophin releasing hormone analogue (RX77368) in motor neuron disease*. *Journal of Neurology, Neurosurgery & Psychiatry*, 1987. **50**(10): p. 1359-70.
44. Hadjikoutis, S., R. Eccles, and C.M. Wiles, *Coughing and choking in motor neuron disease*. *Journal of Neurology, Neurosurgery & Psychiatry*, 2000. **68**(5): p. 601-4.
45. Hadjikoutis, S., et al., *Abnormal patterns of breathing during swallowing in neurological disorders*. *Brain*, 2000. **123**(Pt 9): p. 1863-73.
46. Hadjikoutis, S. and C.M. Wiles, *Respiratory complications related to bulbar dysfunction in motor neuron disease*. *Acta Neurologica Scandinavica*, 2001. **103**(4): p. 207-13.
47. Hansen, A., et al., *Elastic head support for persons with amyotrophic lateral sclerosis*. *Journal of Rehabilitation Research & Development*, 2014. **51**(2): p. 297-303.
48. Hardiman, O., *Symptomatic treatment of respiratory and nutritional failure in amyotrophic lateral sclerosis*. *Journal of Neurology*, 2000. **247**(4): p. 245-51.
49. Heffernan, C., et al., *Nutritional management in MND/ALS patients: an evidence based review*. *Amyotrophic Lateral Sclerosis & Other Motor Neuron Disorders*, 2004. **5**(2): p. 72-83.
50. Higo, R., N. Tayama, and T. Nito, *Longitudinal analysis of progression of dysphagia in amyotrophic lateral sclerosis*. *Auris, Nasus, Larynx*, 2004. **31**(3): p. 247-54.
51. Higo, R., et al., *Videomanofluorometric study in amyotrophic lateral sclerosis*. *Laryngoscope*, 2002. **112**(5): p. 911-7.
52. Hillel, A.D. and R. Miller, *Bulbar amyotrophic lateral sclerosis: patterns of progression and clinical management*. *Head & Neck*, 1989. **11**(1): p. 51-9.
53. Houseman, G., *Symptom management of the patient with amyotrophic lateral sclerosis: a guide for hospice nurses*. *Journal of Hospice & Palliative Nursing*, 2008. **10**(4): p. 207-215 9p.
54. Hughes, T.A. and C.M. Wiles, *Clinical measurement of swallowing in health and in neurogenic dysphagia*. *Qjm*, 1996. **89**(2): p. 109-16.

55. Hughes, T.A. and C.M. Wiles, *Palatal and pharyngeal reflexes in health and in motor neuron disease*. Journal of Neurology, Neurosurgery & Psychiatry, 1996. **61**(1): p. 96-8.
56. Jackson-Tarlton, C.S.B., T. J. Doucette, S., *Correlating factors in the recommendation of feeding tubes in the nutritional management of amyotrophic lateral sclerosis*. Amyotrophic Lateral Sclerosis and Frontotemporal Degeneration, 2016. **17**(7-8): p. 515-521.
57. James, C.M., P.S. Harper, and C.M. Wiles, *Motor neurone disease--a study of prevalence and disability*. Qjm, 1994. **87**(11): p. 693-9.
58. Jani, M.P.G., Geeta Bharat, *Swallowing characteristics in Amyotrophic Lateral Sclerosis*. NeuroRehabilitation, 2016. **39**(2): p. 273-276.
59. Janzen, V.D., R.E. Rae, and A.J. Hudson, *Otolaryngologic manifestations of amyotrophic lateral sclerosis*. Journal of Otolaryngology, 1988. **17**(1): p. 41-2.
60. Jesus, P., et al., *First assessment at home of amyotrophic lateral sclerosis (ALS) patients by a nutrition network in the French region of Limousin*. Amyotrophic Lateral Sclerosis, 2012. **13**(6): p. 538-43.
61. Johnson, J., et al., *Eating-derived pleasure in amyotrophic lateral sclerosis as a predictor of non-oral feeding*. Amyotrophic Lateral Sclerosis, 2012. **13**(6): p. 555-9.
62. Jones, B., *The pharynx: Disorders of function*. Radiologic Clinics of North America, 1994. **32**(6): p. 1103-1115.
63. Kak, M.I., N. P. Roos, R. P. Sweitzer, B. J. Gottlieb, O. Guralnick, A. White, S. R. Semrad, C. E. Soliven, B. Baroody, J. Rezanian, K., *Gastrostomy tube placement is safe in advanced amyotrophic lateral sclerosis*. Neurological Research, 2017. **39**(1): p. 16-22.
64. Kasarskis, E.J., et al., *A retrospective study of percutaneous endoscopic gastrostomy in ALS patients during the BDNF and CNTF trials*. Journal of the Neurological Sciences, 1999. **169**(1-2): p. 118-25.
65. Katzberg, H.D. and M. Benatar, *Enteral tube feeding for amyotrophic lateral sclerosis/motor neuron disease*. Cochrane Database of Systematic Reviews, 2011(1): p. CD004030.
66. Kawai, S., et al., *A study of the early stage of Dysphagia in amyotrophic lateral sclerosis*. Dysphagia, 2003. **18**(1): p. 1-8.
67. Kidney, D., et al., *Oropharyngeal dysphagia in amyotrophic lateral sclerosis: neurological and dysphagia specific rating scales*. Amyotrophic Lateral Sclerosis & Other Motor Neuron Disorders, 2004. **5**(3): p. 150-3.

68. Kikutani, T., F. Tamura, and K. Nishiwaki, *Case presentation: dental treatment with PAP for ALS patient*. International Journal of Orofacial Myology, 2006. **32**: p. 32-5.
69. Kiuchi, S., et al., *Functional disorders of the pharynx and esophagus*. Acta Oto-Laryngologica Supplement, 1969. **256**: p. 1-30.
70. Kosseifi, S.G., et al., *Respiratory failure in a 70-year-old veteran*. Southern Medical Journal, 2010. **103**(4): p. 378-81.
71. Kuhnlein, P., et al., *Diagnosis and treatment of bulbar symptoms in amyotrophic lateral sclerosis*. Nature Clinical Practice Neurology, 2008. **4**(7): p. 366-74.
72. Langmore, S.E., et al., *Enteral tube feeding for amyotrophic lateral sclerosis/motor neuron disease*. Cochrane Database of Systematic Reviews, 2006(4): p. CD004030.
73. Lebo, C.P., K.S. U, and F.H. Norris, Jr., *Cricopharyngeal myotomy in amyotrophic lateral sclerosis*. Laryngoscope, 1976. **86**(6): p. 862-8.
74. Lechtzin, N., *Respiratory effects of amyotrophic lateral sclerosis: problems and solutions*. Respiratory Care, 2006. **51**(8): p. 871-81; discussion 881-4.
75. Leder, S.B., S. Novella, and H. Patwa, *Use of fiberoptic endoscopic evaluation of swallowing (FEES) in patients with amyotrophic lateral sclerosis*. Dysphagia, 2004. **19**(3): p. 177-81.
76. Leighton, S.E., et al., *Swallowing in motor neurone disease*. Journal of the Royal Society of Medicine, 1994. **87**(12): p. 801-5.
77. Lever, T.E., et al., *An animal model of oral dysphagia in amyotrophic lateral sclerosis*. Dysphagia, 2009. **24**(2): p. 180-95.
78. Lever, T.E., et al., *A mouse model of pharyngeal dysphagia in amyotrophic lateral sclerosis*. Dysphagia, 2010. **25**(2): p. 112-26.
79. Li, S., et al., *Structural and functional changes mapped in the brains of amyotrophic lateral sclerosis patients with/without dysphagia: a pilot study*. Amyotrophic Lateral Sclerosis, 2009. **10**(5-6): p. 280-7.
80. Lo Re, G., et al., *Digital cineradiographic study of swallowing in patients with amyotrophic lateral sclerosis*. Radiologia Medica, 2007. **112**(8): p. 1173-87.
81. Loizou, L.A., M. Small, and G.A. Dalton, *Cricopharyngeal myotomy in motor neurone disease*. Journal of Neurology, Neurosurgery & Psychiatry, 1980. **43**(1): p. 42-5.
82. Luchesi, K.F., S. Kitamura, and L.F. Mourao, *Amyotrophic Lateral Sclerosis survival analysis: Swallowing and non-oral feeding*. Neurorehabilitation, 2014. **35**(3): p. 535-42.

83. Luchesi, K.F., S. Kitamura, and L.F. Mourao, *Management of dysphagia in Parkinson's disease and amyotrophic lateral sclerosis*. *Codas*, 2013. **25**(4): p. 358-64.
84. Luchesi, K.F., S. Kitamura, and L.F. Mourao, *Higher risk of complications in odynophagia-associated dysphagia in amyotrophic lateral sclerosis*. *Arquivos de Neuro-Psiquiatria*, 2014. **72**(3): p. 203-7.
85. MacDougall, G., et al., *Analysis of the pharyngoesophageal pressure profile in amyotrophic lateral sclerosis*. *Otolaryngology - Head & Neck Surgery*, 1995. **112**(2): p. 258-61.
86. Mathus-Vliegen, L.M., et al., *Percutaneous endoscopic gastrostomy in patients with amyotrophic lateral sclerosis and impaired pulmonary function*. *Gastrointestinal Endoscopy*, 1994. **40**(4): p. 463-9.
87. Mayberry, J.F. and M. Atkinson, *Swallowing problems in patients with motor neuron disease*. *Journal of Clinical Gastroenterology*, 1986. **8**(3 Pt 1): p. 233-4.
88. Mazzini, L., et al., *Percutaneous endoscopic gastrostomy and enteral nutrition in amyotrophic lateral sclerosis*. *Journal of Neurology*, 1995. **242**(10): p. 695-8.
89. McGuirt, W.F. and D. Blalock, *The otolaryngologist's role in the diagnosis and treatment of amyotrophic lateral sclerosis*. *Laryngoscope*, 1980. **90**(9): p. 1496-501.
90. McKee, H.R., et al., *Macroglossia in amyotrophic lateral sclerosis*. *JAMA Neurology*, 2013. **70**(11): p. 1432-5.
91. Miller, R.G., *Examining the evidence about treatment in ALS/MND*. *Amyotrophic Lateral Sclerosis & Other Motor Neuron Disorders*, 2001. **2**(1): p. 3-7.
92. Mitchell, J.D. and G.D. Borasio, *Amyotrophic lateral sclerosis*. *Lancet*, 2007. **369**(9578): p. 2031-41.
93. Mitsumoto, H., et al., *Percutaneous endoscopic gastrostomy (PEG) in patients with ALS and bulbar dysfunction*. *Amyotrophic Lateral Sclerosis and Other Motor Neuron Disorders*, 2003. **4**(3): p. 177-185.
94. Modarres-Sadeghi, H. and R.J. Guiloff, *Comparative efficacy and safety of intravenous and oral administration of a TRH analogue (RX77368) in motor neuron disease*. *Journal of Neurology, Neurosurgery & Psychiatry*, 1990. **53**(11): p. 944-7.
95. Morimoto, N., et al., *Assessment of swallowing in motor neuron disease and Asidan/SCA36 patients with new methods*. *Journal of the Neurological Sciences*, 2013. **324**(1-2): p. 149-55.
96. Murono, S., et al., *Evaluation of dysphagia at the initial diagnosis of amyotrophic lateral sclerosis*. *Auris, Nasus, Larynx*, 2015. **42**(3): p. 213-7.

97. Nagasaki, T., et al., *Application of a palatal plate in amyotrophic lateral sclerosis: A case report*. Oral Radiology, 2004. **20**(2): p. 76-79.
98. Nakamori, M.H., N. Takaki, S. Oda, M. Hiraoka, A. Yoshikawa, M. Matsushima, H. Ochi, K. Tsuga, K. Maruyama, H. Izumi, Y. Matsumoto, M., *Tongue thickness evaluation using ultrasonography can predict swallowing function in amyotrophic lateral sclerosis patients*. Clinical neurophysiology, 2016. **127**(2): p. 1669-74.
99. Noh, E.J., et al., *A case of amyotrophic lateral sclerosis presented as oropharyngeal Dysphagia*. Journal of neurogastroenterology and motility, 2010. **16**(3): p. 319-22.
100. Nozaki, S., et al., *Prolonged apnea/hypopnea during water swallowing in patients with amyotrophic lateral sclerosis*. Rinsho Shinkeigaku - Clinical Neurology, 2008. **48**(9): p. 634-9.
101. Nunes, G.S., C. A. Grunho, M. Fonseca, J., *Enteral feeding through endoscopic gastrostomy in amyotrophic lateral sclerosis patients*. Nutricion Hospitalaria, 2016. **33**(5): p. 561.
102. Oliver, D., et al., *Development of a pathway to facilitate gastrostomy insertion for patients with MND*. International Journal of Palliative Nursing, 2007. **13**(9): p. 426-9.
103. Omari, T.I., et al., *Upper esophageal sphincter mechanical states analysis: a novel methodology to describe UES relaxation and opening*. Frontiers in Systems Neuroscience, 2014. **8**: p. 241.
104. Orsini, M., et al., *Severity and functional ability scale for amyotrophic lateral sclerosis patients: Preliminary results*. Revista Neurociencias, 2008. **16**(3): p. 194-203.
105. Paganoni, S.K., Chafic Joyce, Nanette Bedlack, Richard Carter, Gregory T., *Comprehensive rehabilitative care across the spectrum of amyotrophic lateral sclerosis*. NeuroRehabilitation, 2015. **37**(1): p. 53-68.
106. Palovcak, M., et al., *Diagnostic and therapeutic methods in the management of dysphagia in the ALS population: issues in efficacy for the out-patient setting*. Neurorehabilitation, 2007. **22**(6): p. 417-23.
107. Paris, G., et al., *Clinical screening of oropharyngeal dysphagia in patients with ALS*. Annals of Physical & Rehabilitation Medicine, 2012. **55**(9-10): p. 601-8.
108. Paris, G., et al., *Oropharyngeal dysphagia in amyotrophic lateral sclerosis alters quality of life*. Journal of Oral Rehabilitation, 2013. **40**(3): p. 199-204.
109. Park, J.H. and S.W. Kang, *Percutaneous radiologic gastrostomy in patients with amyotrophic lateral sclerosis on noninvasive ventilation*. Archives of Physical Medicine & Rehabilitation, 2009. **90**(6): p. 1026-9.

110. Perry, A., et al., *Elevation of the soft palate in speech and swallowing in normal female participants and females with motor neuron disease: an innovative procedure for measuring palatal elevation*. International Journal of Language & Communication Disorders, 2002. **37**(2): p. 197-214.
111. Pinto, S., et al., *Respiratory apraxia in amyotrophic lateral sclerosis*. Amyotrophic Lateral Sclerosis, 2007. **8**(3): p. 180-4.
112. Plowman, E.K.T., L. C. Robison, R. Gaziano, J. Dion, C. Watts, S. A. Vu, T. Gooch, C., *Discriminant ability of the Eating Assessment Tool-10 to detect aspiration in individuals with amyotrophic lateral sclerosis*. Neurogastroenterology and Motility, 2016. **28**(1): p. 85-90.
113. Plowman, E.K.W., S. A. Tabor, L. Robison, R. Gaziano, J. Domer, A. S. Richter, J. Vu, T. Gooch, C., *Impact of expiratory strength training in amyotrophic lateral sclerosis*. Muscle and Nerve., 2016.
114. Plowman, E.W., Stephanie Robison, Raele Tabor, Lauren Dion, Charles Gaziano, Joy Vu, Tuan Gooch, Clifton Plowman, Emily K. Watts, Stephanie A., *Voluntary Cough Airflow Differentiates Safe Versus Unsafe Swallowing in Amyotrophic Lateral Sclerosis*. Dysphagia (0179051X), 2016. **31**(3): p. 383-390.
115. Procaccini, N.J. and E.C. Nemergut, *Percutaneous endoscopic gastrostomy in the patient with amyotrophic lateral sclerosis: Risk vs benefit?* Practical Gastroenterology, 2008. **32**(3): p. 24-34.
116. ProGas Study, G., *Gastrostomy in patients with amyotrophic lateral sclerosis (ProGas): a prospective cohort study*. Lancet Neurology, 2015. **14**(7): p. 702-9.
117. Restivo, D.A., et al., *ALS dysphagia pathophysiology: differential botulinum toxin response*. Neurology, 2013. **80**(7): p. 616-20.
118. Rio, A., et al., *Nutritional care of patients with motor neurone disease*. British Journal of Neuroscience Nursing, 2005. **1**(1): p. 38-43 6p.
119. Robbins, J., *Swallowing in ALS and motor neuron disorders*. Neurologic Clinics, 1987. **5**(2): p. 213-29.
120. Rubin, A.D., et al., *A new member of the multidisciplinary ALS team: the otolaryngologist*. Amyotrophic Lateral Sclerosis, 2012. **13**(2): p. 229-32.
121. Ruoppolo, G., et al., *Dysphagia in amyotrophic lateral sclerosis: prevalence and clinical findings*. Acta Neurologica Scandinavica, 2013. **128**(6): p. 397-401.
122. Ruoppolo, G.O., E. Gori, M. C. Schettino, I. Frasca, V. Biasiotta, A. Giordano, C. Ceccanti, M. Cambieri, C. Greco, A. Buonopane, C. E. Cruccu, G. De Vincentiis, M. Inghilleri, M., *Laryngeal sensitivity in patients with amyotrophic lateral sclerosis*. Frontiers in Neurology, 2016. **7 (NOV) (no pagination)**(212).

123. Sancho, J., et al., *Noninvasive respiratory muscle aids during PEG placement in ALS patients with severe ventilatory impairment*. Journal of the Neurological Sciences, 2010. **297**(1-2): p. 55-9.
124. Sawyerr, A.M., S. Ghosh, and M.A. Eastwood, *Satisfactory outcome of percutaneous endoscopic gastrostomy in two patients with cirrhosis and portal hypertension*. American Journal of Gastroenterology, 1995. **90**(5): p. 826-8.
125. Scott, A. and A. Heughan, *A review of dysphagia in four cases of motor neurone disease*. Palliative Medicine, 1993. **7**(4 Suppl): p. 41-7.
126. Scott, A.G. and H.E. Austin, *Nasogastric feeding in the management of severe dysphagia in motor neurone disease*. Palliative Medicine, 1994. **8**(1): p. 45-9.
127. Selley, W.G., et al., *Respiratory patterns associated with swallowing: Part 2. Neurologically impaired dysphagic patients*. Age & Ageing, 1989. **18**(3): p. 173-6.
128. Silani, V., E.J. Kasarskis, and N. Yanagisawa, *Nutritional management in amyotrophic lateral sclerosis: a worldwide perspective*. Journal of Neurology, 1998. **245 Suppl 2**: p. S13-9; discussion S29.
129. Silverstein, A. and D. Faegenburg, *Cineradiography of Swallowing. Observation in Patients with Lesions of Brain Stem, Lower Cranial Nerves, or Bulbar Musculature*. Archives of Neurology, 1965. **12**: p. 67-71.
130. Simione, M.W., E. M. Yunusova, Y. Green, J. R., *Validation of Clinical Observations of Mastication in Persons with ALS*. Dysphagia, 2016. **31**(3): p. 367-375.
131. Smith, R.O., et al., *Injection of silicone lateral to a vocal cord in a patient with progressive bulbar palsy*. Neurology, 1967. **17**(12): p. 1217-8.
132. Smith, R.P., E. Myers, K. Sirdofsky, M. Goslin, K. Meekins, G. Yu, H. Wymer, J. Cudkowicz, M. Macklin, E. A. Schoenfeld, D. Pattee, G., *Enhanced Bulbar Function in Amyotrophic Lateral Sclerosis: The Nuedexta Treatment Trial*. Neurotherapeutics, 2017: p. 1-12.
133. Smittkamp, S.E., et al., *Measures of bulbar and spinal motor function, muscle innervation, and mitochondrial function in ALS rats*. Behavioural Brain Research, 2010. **211**(1): p. 48-57.
134. Solazzo, A., et al., *Search for compensation postures with videofluoromanometric investigation in dysphagic patients affected by amyotrophic lateral sclerosis*. Radiologia Medica, 2011. **116**(7): p. 1083-94.
135. Solazzo, A., et al., *Earliest videofluoromanometric pharyngeal signs of dysphagia in ALS patients*. Dysphagia, 2014. **29**(5): p. 539-44.

136. Spataro, R., et al., *Percutaneous endoscopic gastrostomy in amyotrophic lateral sclerosis: effect on survival*. Journal of the Neurological Sciences, 2011. **304**(1-2): p. 44-8.
137. Stavroulakis, T., et al., *Factors influencing decision-making in relation to timing of gastrostomy insertion in patients with motor neurone disease*. BMJ supportive & palliative care, 2014. **4**(1): p. 57-63.
138. Stavroulakis, T., et al., *The impact of gastrostomy in motor neurone disease: challenges and benefits from a patient and carer perspective*. BMJ Support Palliat Care, 2014.
139. Stavroulakis, T., et al., *Gastrostomy use in motor neurone disease (MND): a review, meta-analysis and survey of current practice*. Amyotrophic Lateral sclerosis & Frontotemporal Degeneration, 2013. **14**(2): p. 96-104.
140. Stavroulakis, T.B., W. O. Baxter, S. K. Walsh, T. Shaw, P. J. McDermott, C. J., *The impact of gastrostomy in motor neurone disease: challenges and benefits from a patient and carer perspective*. BMJ supportive & palliative care, 2016. **6**(1): p. 52-9.
141. Strand, E.A., et al., *Management of oral-pharyngeal dysphagia symptoms in amyotrophic lateral sclerosis*. Dysphagia, 1996. **11**(2): p. 129-39.
142. Szacka, K.P.-C., A. Fronczewska-Wieniawska, K. Spychaa, A. Krolicki, L. Kuma-Kozakiewicz, M., *Scintigraphic evaluation of mild to moderate dysphagia in motor neuron disease*. Clinical Nuclear Medicine, 2016. **41**(4): p. e175-e180.
143. Tabor, L.G., J. Watts, S. Robison, R. Plowman, E. K., *Defining Swallowing-Related Quality of Life Profiles in Individuals with Amyotrophic Lateral Sclerosis*. Dysphagia, 2016. **31**(3): p. 376-382.
144. Takasaki, K., et al., *Evaluation of swallowing pressure in a patient with amyotrophic lateral sclerosis before and after cricopharyngeal myotomy using high-resolution manometry system*. Auris, Nasus, Larynx, 2010. **37**(5): p. 644-7.
145. Talacko, A.A. and P.C. Reade, *Progressive bulbar palsy: a case report of a type of motor neuron disease presenting with oral symptoms*. Oral Surgery, Oral Medicine, Oral Pathology, 1990. **69**(2): p. 182-4.
146. Tamburrini, S., et al., *Amyotrophic lateral sclerosis: sonographic evaluation of dysphagia*. Radiologia Medica, 2010. **115**(5): p. 784-93.
147. Teismann, I.K., et al., *Cortical processing of swallowing in ALS patients with progressive dysphagia--a magnetoencephalographic study*. PLoS ONE [Electronic Resource], 2011. **6**(5): p. e19987.
148. Tomik, J., et al., *Profile of laryngological abnormalities in patients with amyotrophic lateral sclerosis*. Journal of Laryngology & Otology, 2007. **121**(11): p. 1064-9.

149. Umemoto, G.F., H. Arahata, H. Sugahara, M. Sakai, M. Tsuboi, Y., *Relationship between tongue thickness and tongue pressure in neuromuscular disorders*. *Neurology and Clinical Neuroscience*, 2016. **4**(4): p. 142-145.
150. Valadi, N., *Evaluation and management of amyotrophic lateral sclerosis*. *Primary Care; Clinics in Office Practice*, 2015. **42**(2): p. 177-87.
151. Wada, A., et al., *Development of a new scale for dysphagia in patients with progressive neuromuscular diseases: the Neuromuscular Disease Swallowing Status Scale (NdSSS)*. *Journal of Neurology*, 2015. **262**(10): p. 2225-31.
152. Walshe, M., *Oropharyngeal dysphagia in neurodegenerative disease*. *Journal of Gastroenterology and Hepatology Research*, 2014. **3**(10): p. 1265-1271.
153. Watanabe, R., et al., *Primary lateral sclerosis*. *Neuropathology*, 1997. **17**(3): p. 220-224.
154. Watts, C.R. and M. Vanryckeghem, *Laryngeal dysfunction in Amyotrophic Lateral Sclerosis: A review and case report*. *BMC Ear, Nose and Throat Disorders*, 2001. **1**: p. 1-5.
155. Wijesekera, L.C. and P.N. Leigh, *Amyotrophic lateral sclerosis*. *Orphanet Journal of Rare Diseases*, 2009. **4**(1).
156. Wilson, P.S., F.J. Bruce-Lockhart, and A.P. Johnson, *Videofluoroscopy in motor neurone disease prior to cricopharyngeal myotomy*. *Annals of the Royal College of Surgeons of England*, 1990. **72**(6): p. 375-7.
157. Wright, R. and C. Jordan, *Videofluoroscopic evaluation of dysphagia in motor neurone disease with modified barium swallow*. *Palliative Medicine*, 1997. **11**(1): p. 44-8.
